# Supplementary material for: Using defined finger–finger interfaces as units of assembly for constructing zinc-finger nucleases
Source: PubMed Central journal article supplement — Nucleic Acids Res. 2013 Jan 7;41(4):2455–65. doi: 10.1093/nar/gks1357 (PMC3575815; doi:10.1093/nar/gks1357), 2013-01-07
Supplement: supp_gks1357_nar-03000-h-2012-File007.pdf [file supp_gks1357_nar-03000-h-2012-File007.pdf]

**Supplementary Table 1:** Sequences recovered from each of the GANNAG selections.

See attached excel file (Supplementary Table 1.xlsx) for the sequences of the 2 finger modules recovered from each binding site selection.

**Supplementary Table 2:** Recognition helix sequences (positions 5 & 6 of Finger 1 and -1, 1 & 2 of Finger 2) of 16 two-finger modules that preferentially recognize each of the GANNAG target sites. Light blue background indicates modules where the indicated dinucleotide junction is not the most preferred sequence.

|    | A      | C      | G      | T      | 3' |
|----|--------|--------|--------|--------|----|
| 5' | A      | KV QKP | KR QRN | RT QRS |    |
| C  | KT DPA | KR DPS | KR DKS | RT DHS |    |
| G  | KV RKG | KQ RNS | VR RFD | RT RSD |    |
| T  | KD ARG | RV HSS | KR LKY | QS FRT |    |

**Supplementary Table 3.** Sequences of the modularly-assembled and stitched ZFAs utilized in ZFNs in this study. (See attached file Supplementary Table 3.xlsx)

**Supplementary Table 4:** Comparison of modules used in ZFNs from the CoDA<sup>1</sup> study and our recent two finger module archives.

|                                                                | CoDA <sup>1</sup> | gANNHg <sup>2</sup> |
|----------------------------------------------------------------|-------------------|---------------------|
| Number of ZFNs assayed                                         | 39                | 18                  |
| Number of ZFNs active (>1%)                                    | 20                | 13                  |
| Percentage of GNN modules                                      | 99%               | 51%                 |
| Number of ZFNs with non-GNN fingers<br>(number of active ZFNs) | 2 (1)             | 18 (13)             |

1. Sander *et. al.*, *Nat. Methods* **8**, 67-69, 2011
2. ZFNs in this study and Gupta *et. al.*, *Nat. Methods* **9**, 588-90, 2012

**Supplementary Table 5:**

|                                                                                                 | <b>Gupta<br/>1/2FM</b> | <b>w/stitching</b> |
|-------------------------------------------------------------------------------------------------|------------------------|--------------------|
| Archive Reference                                                                               | A                      | B                  |
| Number of <b>Unique</b> ZFN sites in zebrafish protein-coding exons (25090 unique genes Zv9.64) | 608,081                | 754,923            |
| Fraction of zebrafish protein-coding genes containing ZFN site                                  | 95.0%                  | 98.0%              |
| Average density of ZFN sites (# bp/site)                                                        | 132                    | 109                |

A = Gupta, A. et al. *Nat. Methods* **9**, 588-90, 2012 & Zhu, C. et al. *Development* **138**, 4555, 2011.

B = Modules in Gupta 1/2FM archive and the new fingers and stitching method in this manuscript

**Supplementary Figure 1.** Recognition motifs for 77 GANNAG two-finger modules characterized in the B1H system. The recognition motif for each two-finger module is displayed as a Sequence Logo. The identity of the specificity determinants at the randomized recognition positions (Finger 1 positions 5 and 6, and Finger 2 positions -1, 1 and 2) in the characterized module are displayed above each recovered recognition motif.

**Supplementary Figure 2.** T7EI analysis of lesions in zebrafish targets for modularly-assembled ZFNs (*IRS2*, *met* and *sim1a*). Schematic representation of the 3 pairs of ZFNs targeting *IRS2*, *met* and *sim1a* are shown above each gel. Only the six finger constructs are shown. Finger number was reduced by progressively removing fingers from the N-terminus of the constructs. The positions of two-finger modules (GANNAG) described herein or fingers from other archives (GRNNCG (50) and single fingers (41)) within these ZFAs are indicated as in Figure 4, as is the position of the THPRAPIPKP linker that allows a single base pair to be skipped between intervening modules (65). T7EI digestion of PCR products spanning the genomic target site for normal embryos are shown. Cleavage products of the appropriate size for ZFN-induced lesions are indicated by red dots.

**Supplementary Figure 3.** B1H DNA-binding specificity for *abcc8* and *BRCA1* ZFAs. Sequence logos for each ZFA are shown with the dinucleotide junctions at the stitched interfaces boxed. The desired recognition sequence is shown to

the left of the logo with the dinucleotide junctions at the stitched interfaces underlined and the Adenines representing positions of two-finger module splice sites in bold. The recognition helices of the fingers are shown to the right of the logos with the C-terminal finger listed at the bottom. Stitched fingers are boxed in red.

**Supplementary Figure 4.** Top) Dose response curve of the *hebp2* ZFNs in zebrafish embryos. Morphology of embryos was assayed at 24 hpf (24). Bottom) Lesion frequency was assessed by T7EI sensitivity of a PCR product spanning the genomic target site (39,63). Lesion frequency was determined by ImageJ analysis of the uncleaved and cleaved DNA bands, where the black dot indicates the position of the cleaved band on the gel.

**Supplementary Figure 5.** Top) Dose response curve of the *abcc8* ZFNs in zebrafish embryos. Morphology of embryos was assayed at 24 hpf (24). Bottom) Lesion frequency was assessed by T7EI sensitivity of a PCR product spanning the genomic target site (39,63). Lesion frequency was determined by ImageJ analysis of the uncleaved and cleaved DNA bands, where the black dot indicates the position of the cleaved band on the gel.

**Supplementary Figure 6.** Top) Dose response curve of the *col17a1a* ZFNs in zebrafish embryos. Morphology of embryos was assayed at 24 hpf (24).

Bottom) Lesion frequency was assessed by Hpy166II resistance of a PCR product spanning the genomic target site. Lesion frequency was determined by ImageJ analysis of the uncleaved and cleaved DNA bands, where the red dot indicates the position of the uncleaved band on the gel.

**Supplementary Figure 7.** Lesion analysis for the *BRCA1* ZFNs in 293T cells. Lesion frequency was assessed by T7EI sensitivity of a PCR product spanning the genomic target site (39,63). Lesion frequency was determined by ImageJ analysis of the uncleaved and cleaved DNA bands, where the black dot indicates the position of the cleaved band on the gel.

**Supplementary Figure 8.** Lesion sequences recovered from zebrafish ZFN loci. Wild-type sequences are shown at the top of each set of sequence for each ZFN. Sequences with lesions recovered from our LacZ reporter system are shown below with the type of lesion indicated to the right of the sequence.



# Supplementary Figure 1.

AQ-TGR

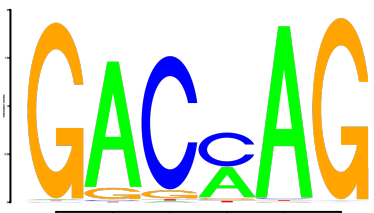

AR-LKH

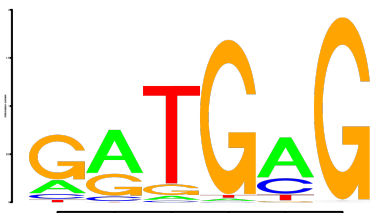

AR-QKG

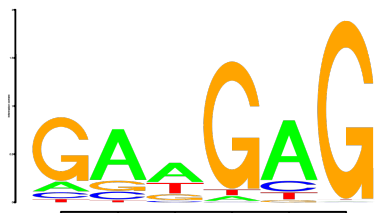

AR-QRG

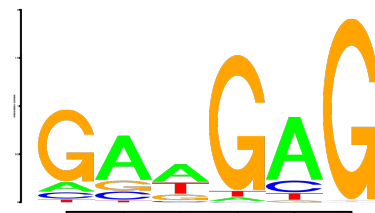

AR-RGD

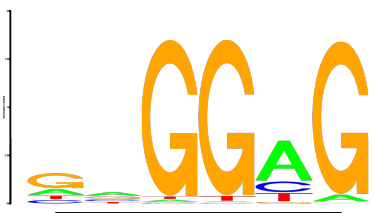

AT-SRS

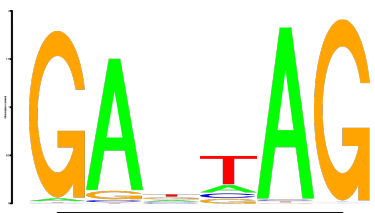

GD-RAY

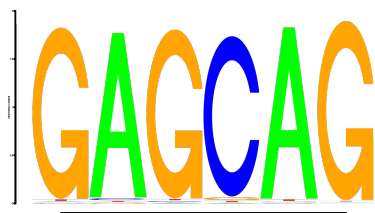

GR-TVH

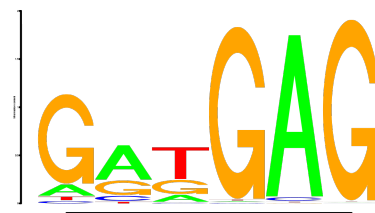

IR-RRC

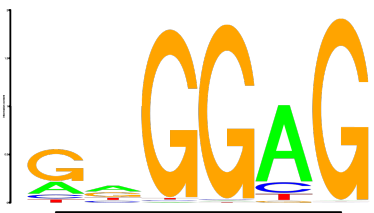

IV-VRS

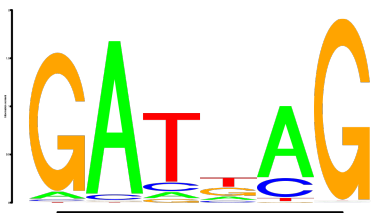

KA-DKS

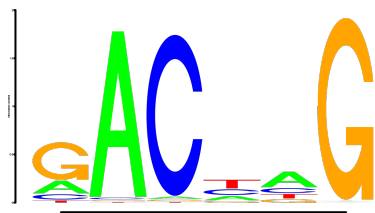

KA-LSA

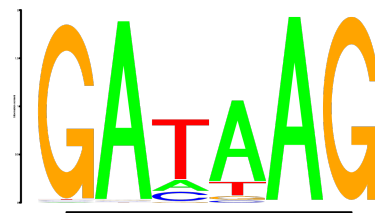

KA-QRS

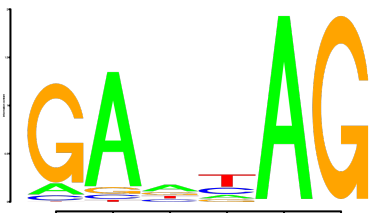

KA-RNF

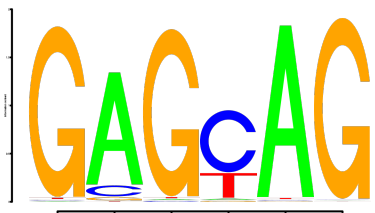

KA-RRY

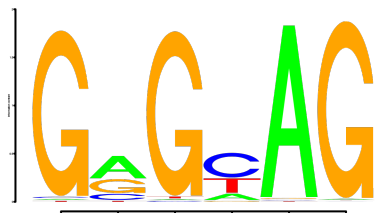

KA-YKS

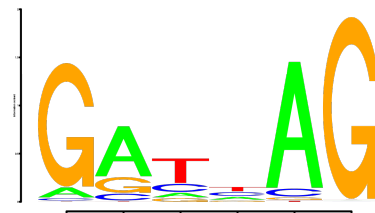

KA-YKT

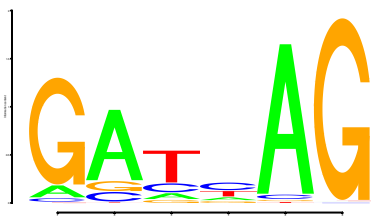

KD-ARG

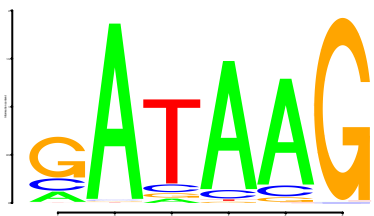

KD-DRS

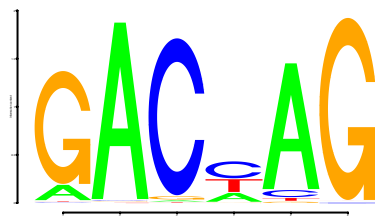

KD-QRG

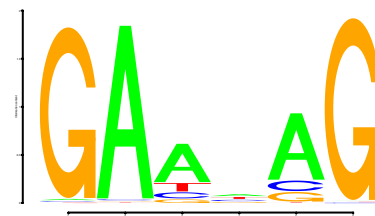

KL-CRS

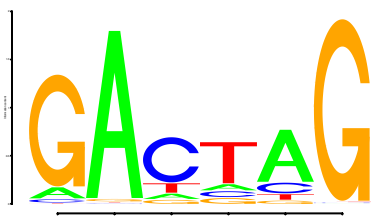

KL-DAS

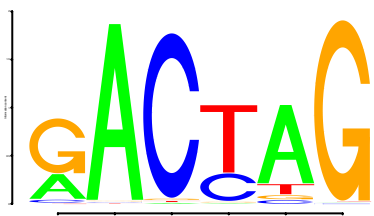

KL-QRG

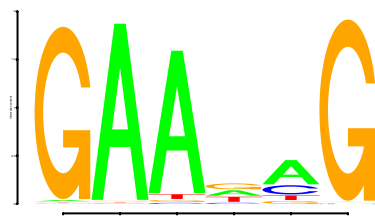

KN-DPA

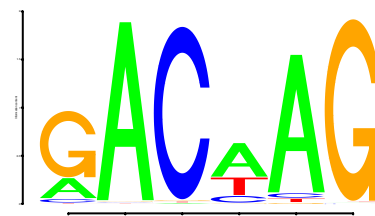

KQ-DPA

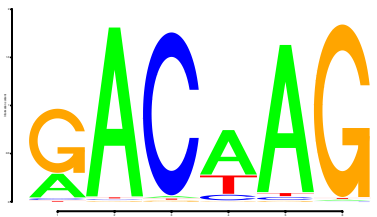

KQ-RNS

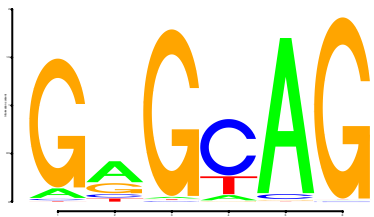

KQ-RRN

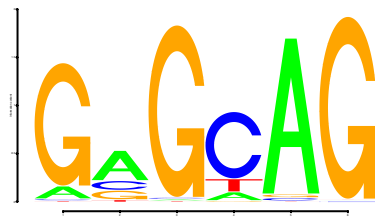

KQ-RSS

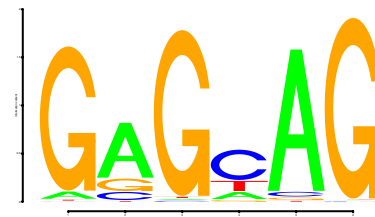

KR-DKS

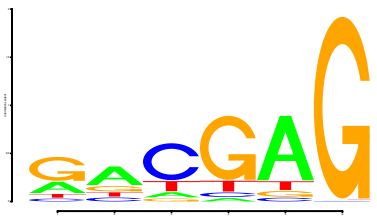

KR-DPS

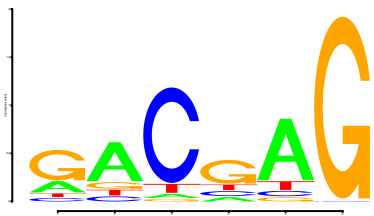

KR-ERG

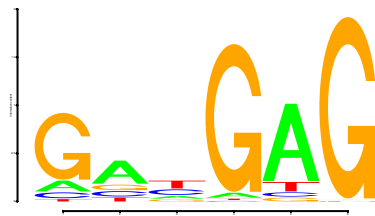

KR-LKY

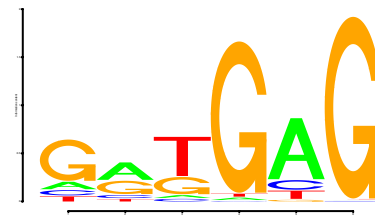



LR-DPT

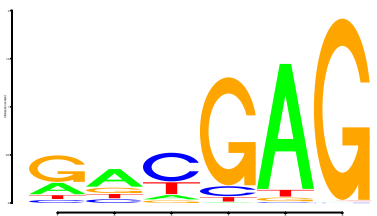

LR-LSH

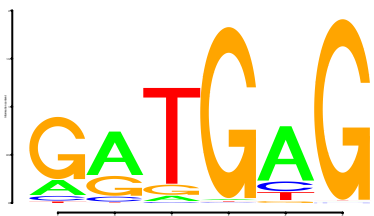

LR-TAY

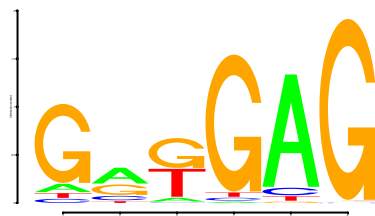

LV-QSG

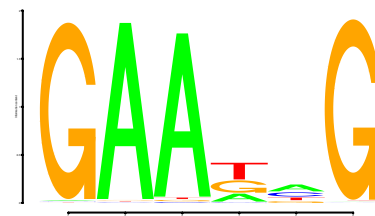

MD-ARG

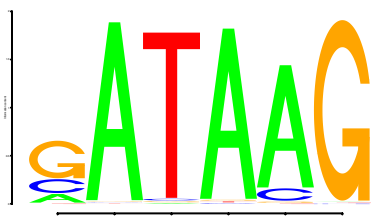

MQ-RRF

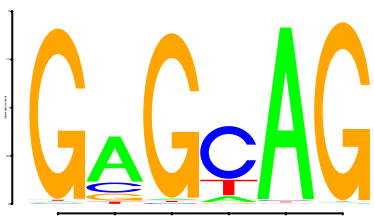

MR-RRC

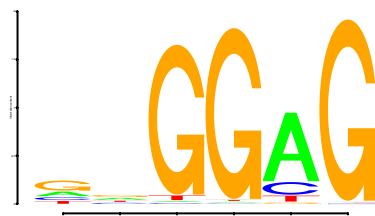

MS-VKQ

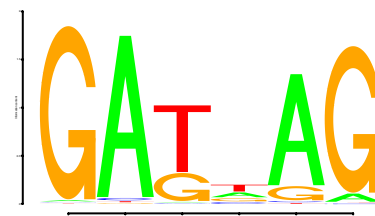

NK-DPS

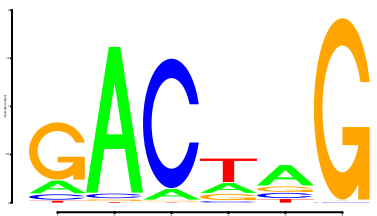

QA-FGG

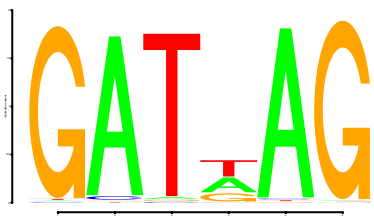

QS-FRT

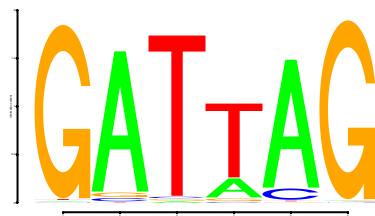

QV-HSS

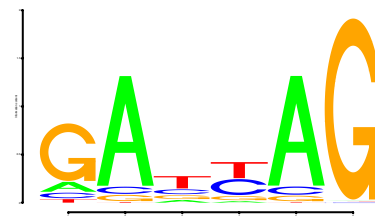

QV-QRS

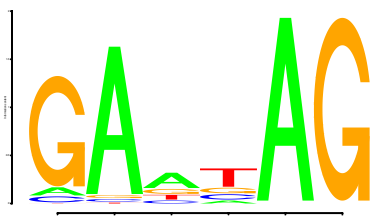

RL-SRS

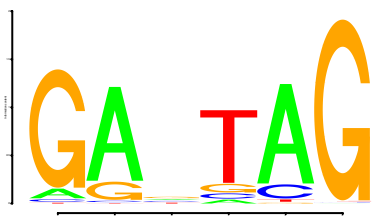

RR-TRY

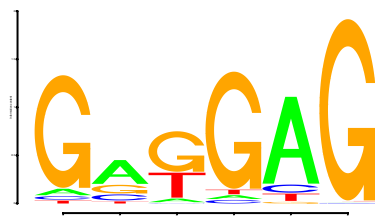

RS-AKS

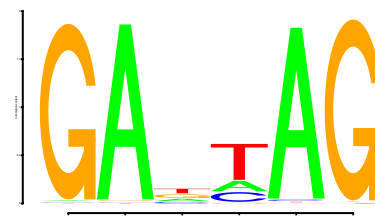

RT-ARS

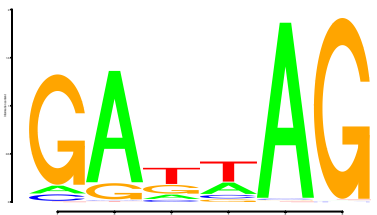

RT-DHS

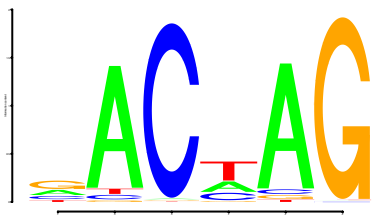

RT-DRS

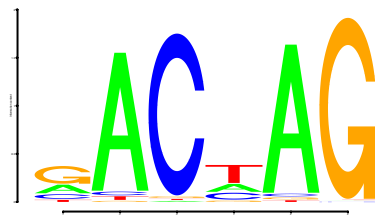

RT-QRS

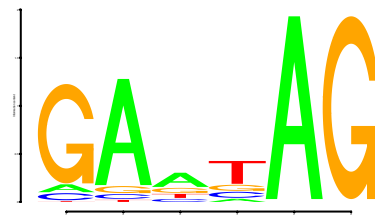

RT-RID

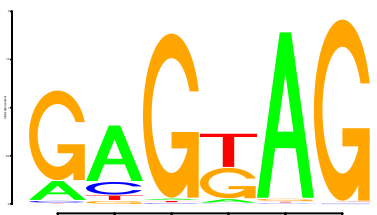

RT-RSD

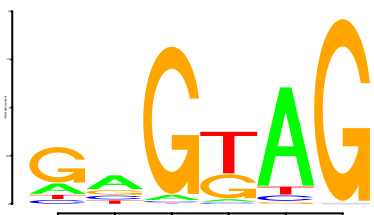

RT-TGS

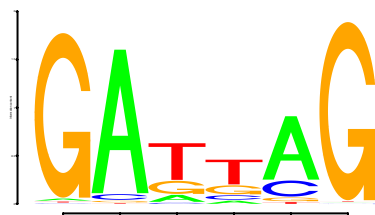

RV-HSS

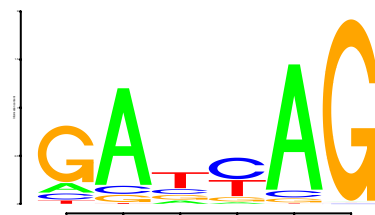

RV-QLI

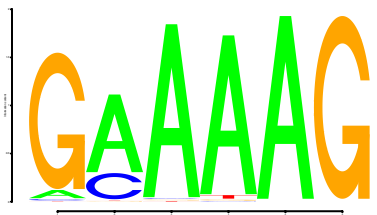

RV-QRG

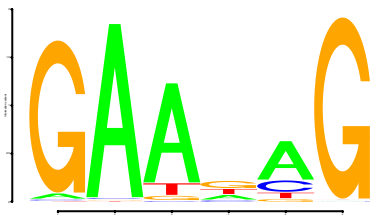

VI-QSS

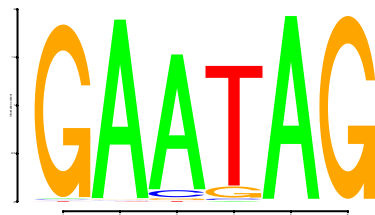

VR-CGS

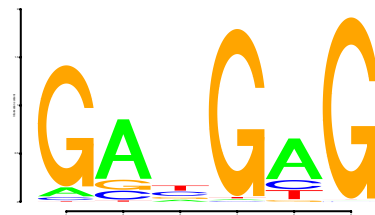

VR-RFD

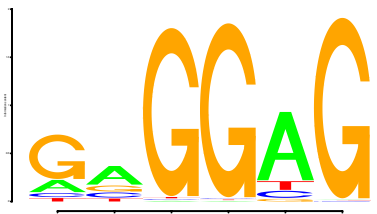

Zif268

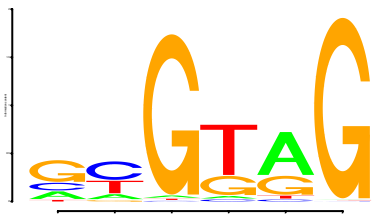

Supplementary Figure 2.

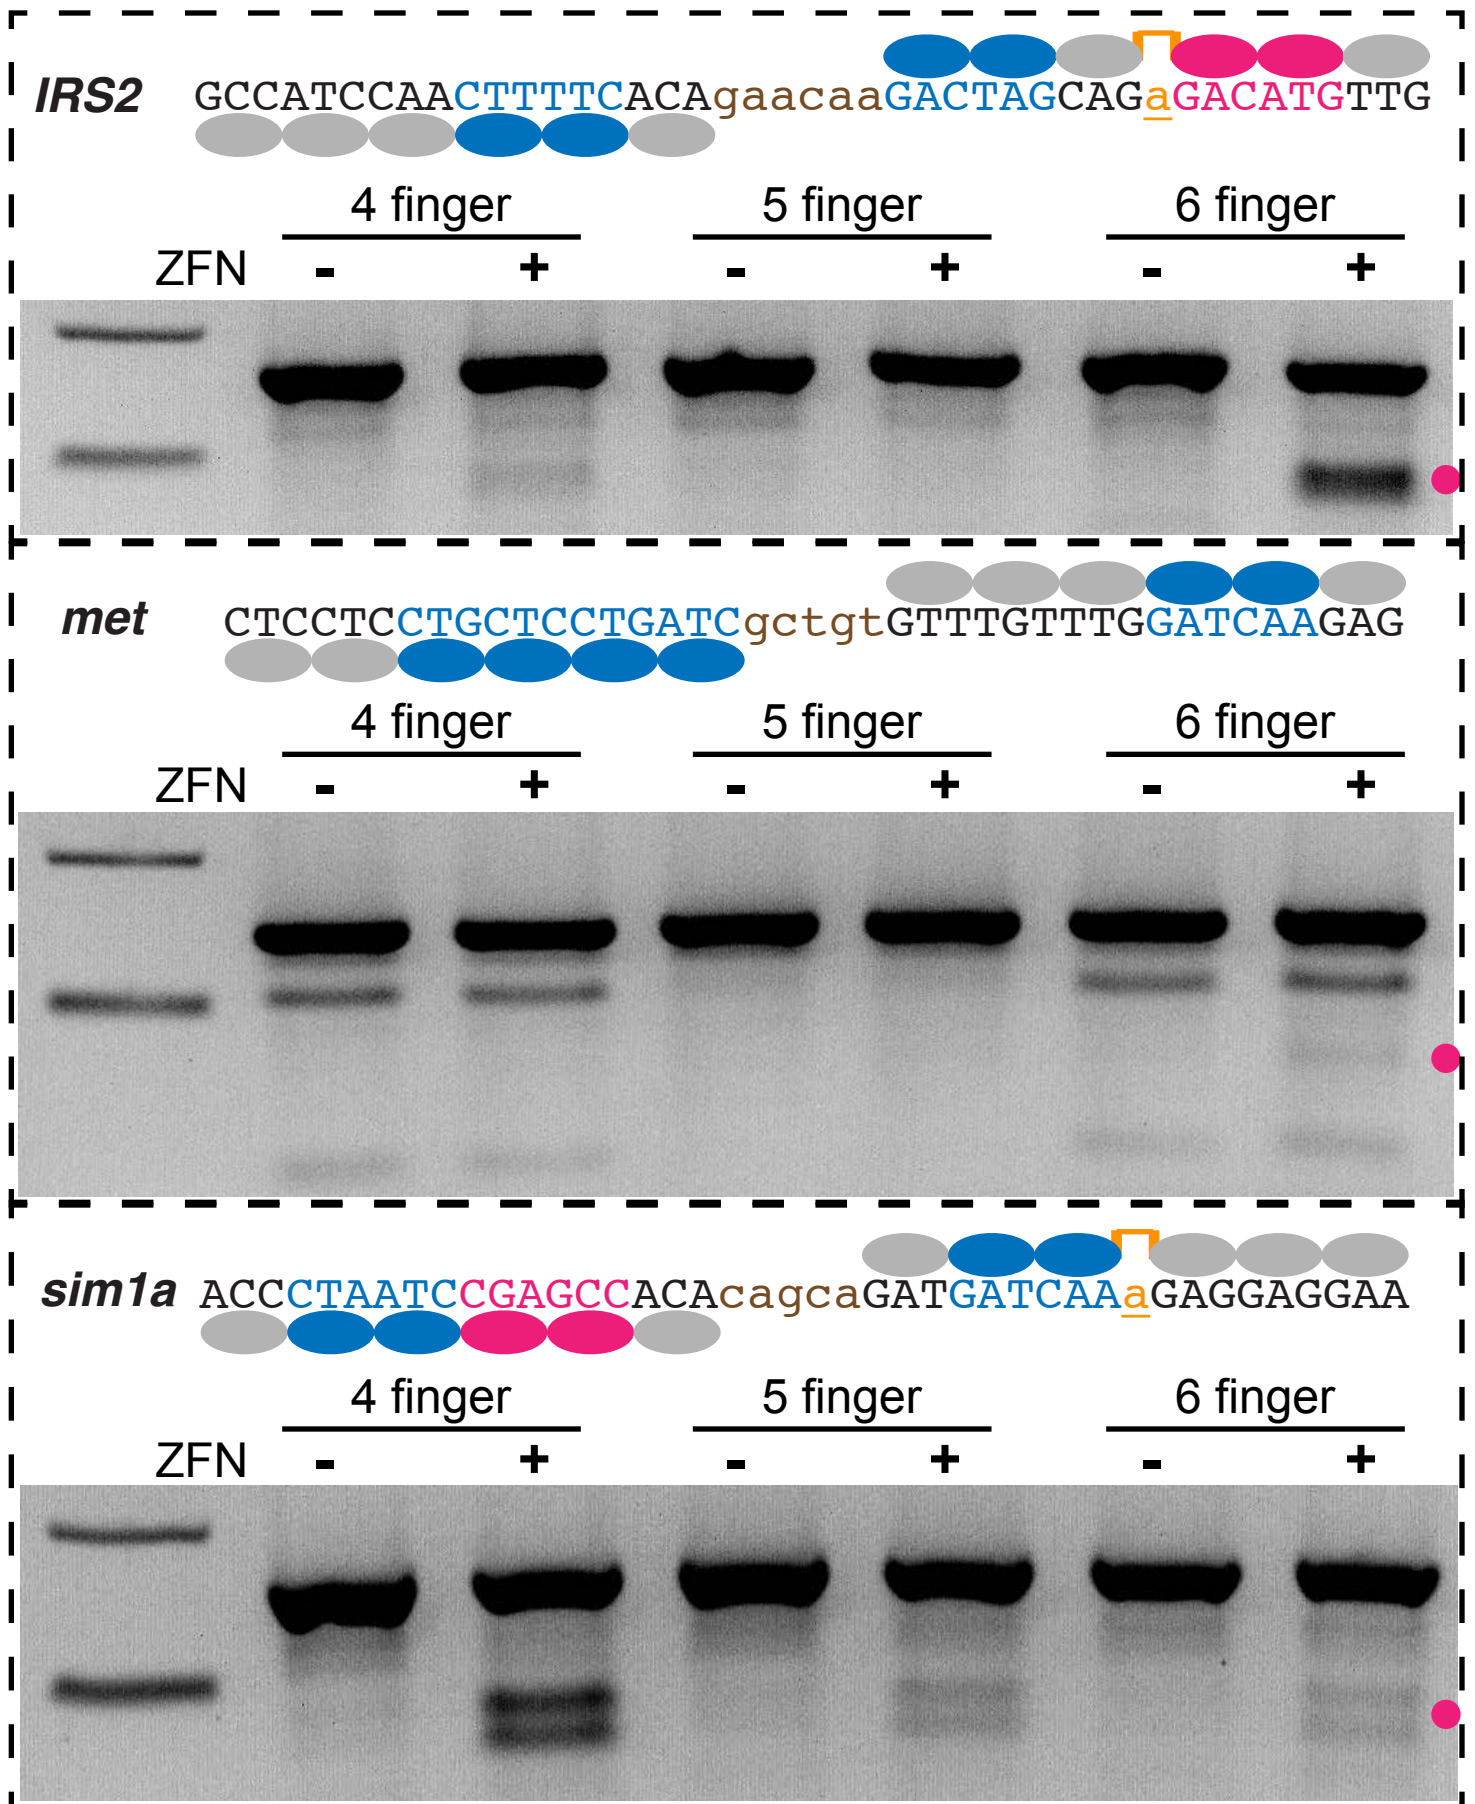

Supplementary Figure 3

**abcc8-5p**  
 GAGAGCCG

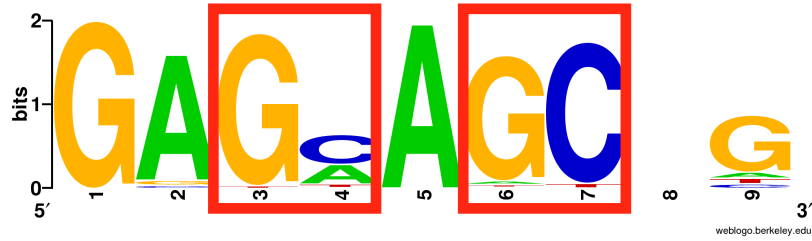

F1 RSDTLKE  
 F2 RSSNLKV  
 F3 RKGNLTR

**abcc8-3p**  
 ACAGATAATGCA

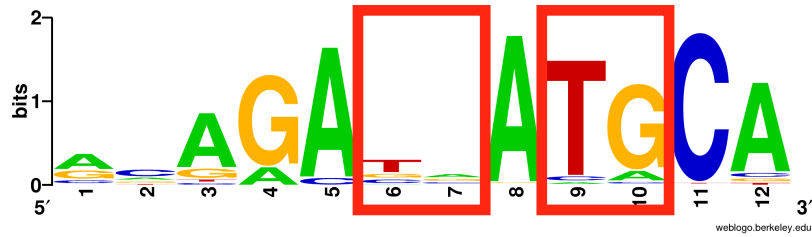

F1 QRGTLKR  
 F2 LKYNLKQ  
 F3 AAGNLTR  
 F4 QRGTLKN

**BRCA1-5p**  
 GACCACCACAG

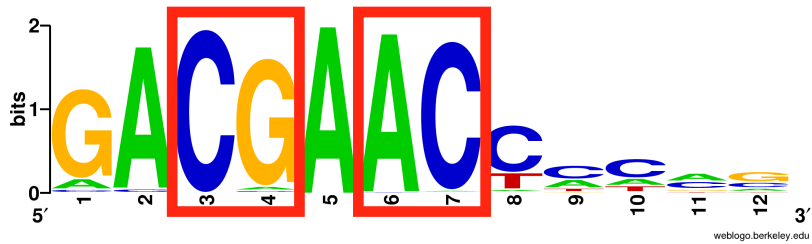

F1 RSDNLSE  
 F2 QRGTLVE  
 F3 QRGNLKR  
 F4 DPSNLTR

**BRCA1-3p**  
 GATAAGCCAGTT

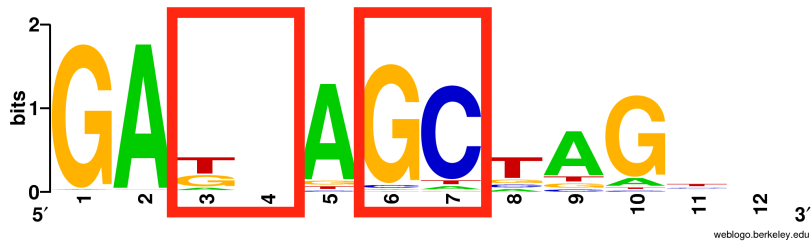

F1 TSGSLSR  
 F2 QRGTLKE  
 F3 RSSNLKQ  
 F4 AAGNLTR

Supplementary Figure 4.

**hebp2**    **ATTGATACTTTTC** *agggt* **GATGACTATGAAG**

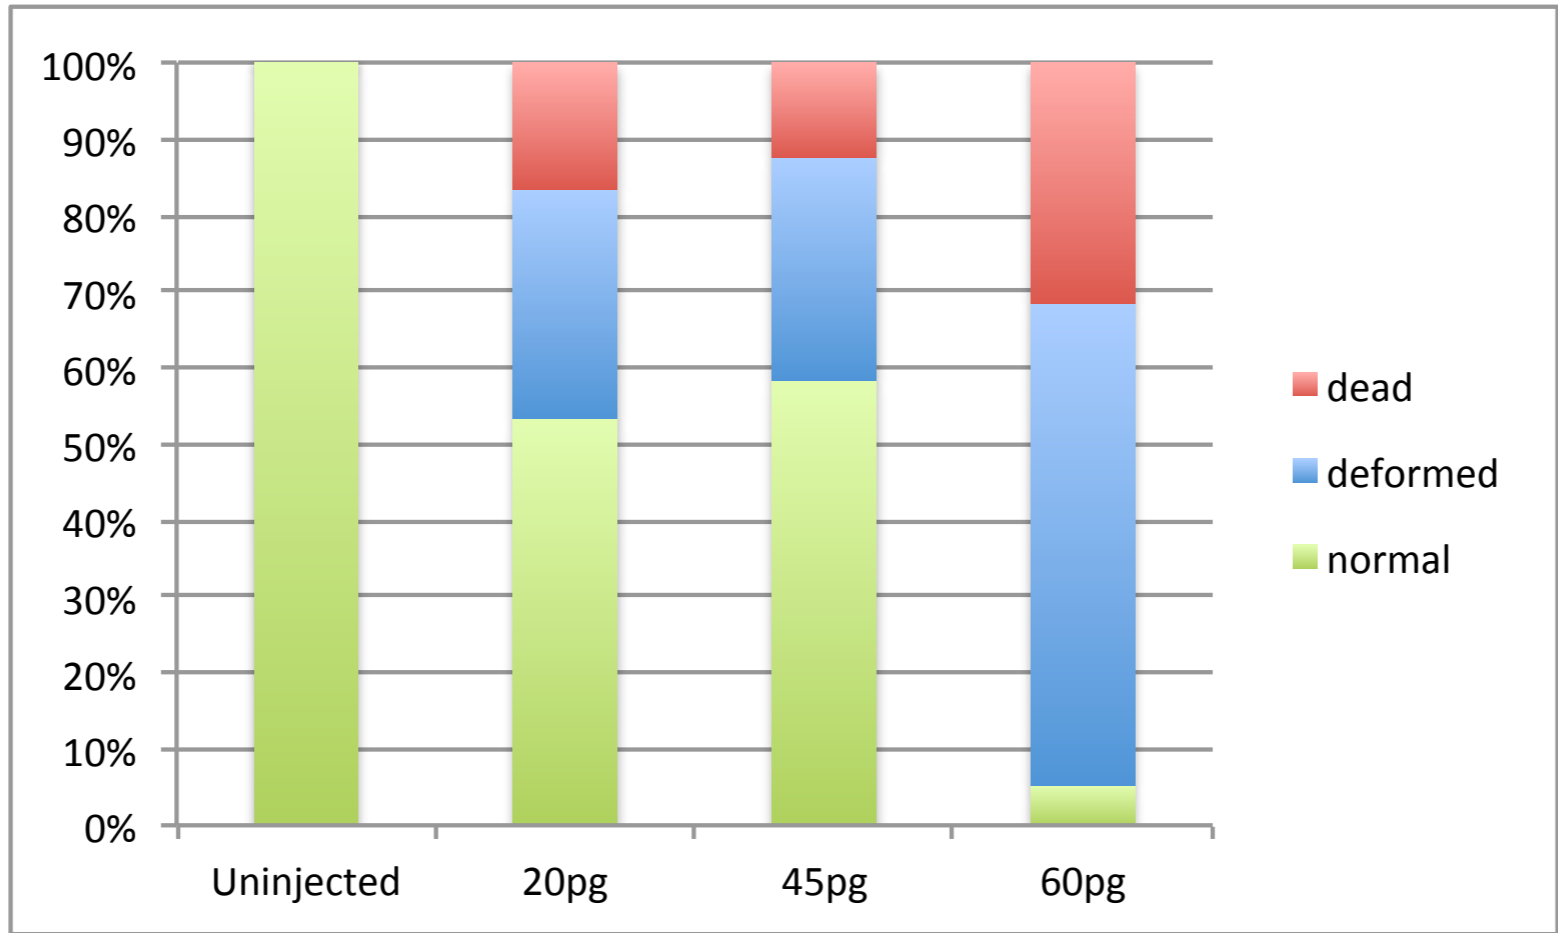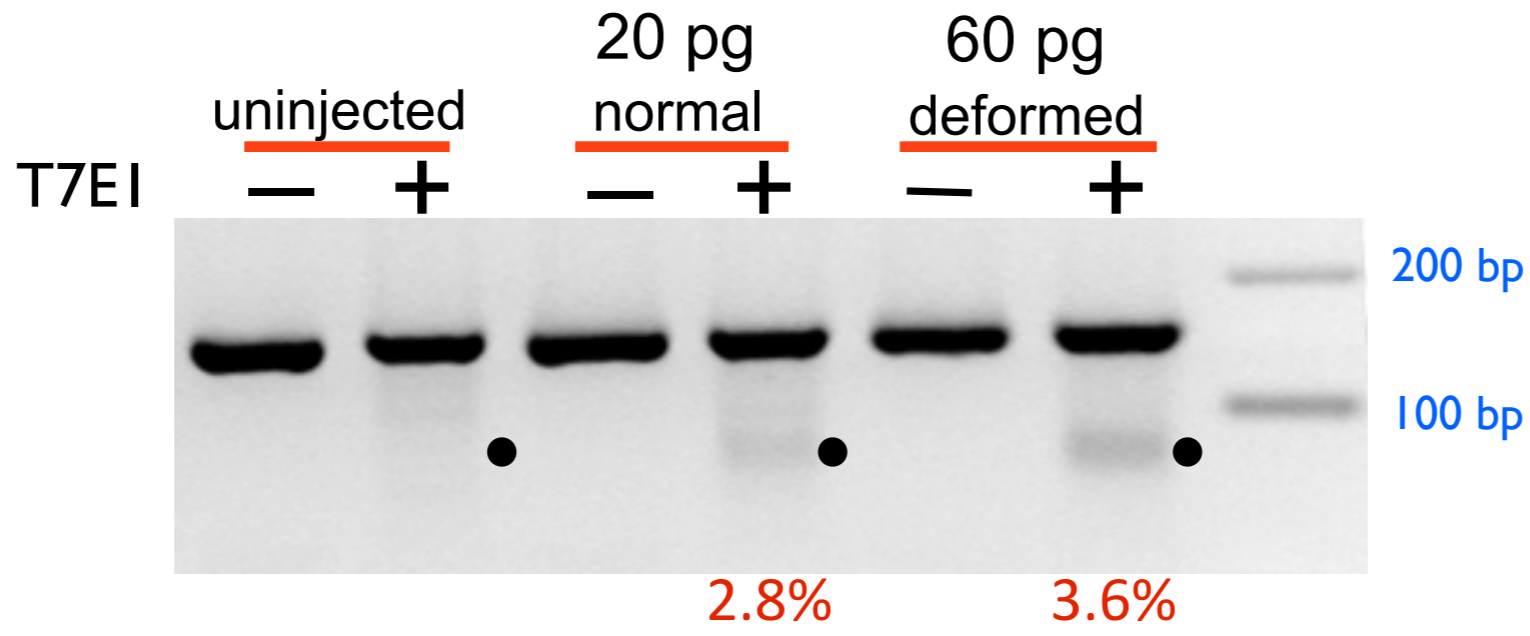



Supplementary Figure 5.

***abcc8*** CGGCTTCTC **tgtgg** ACAGATAATGCA

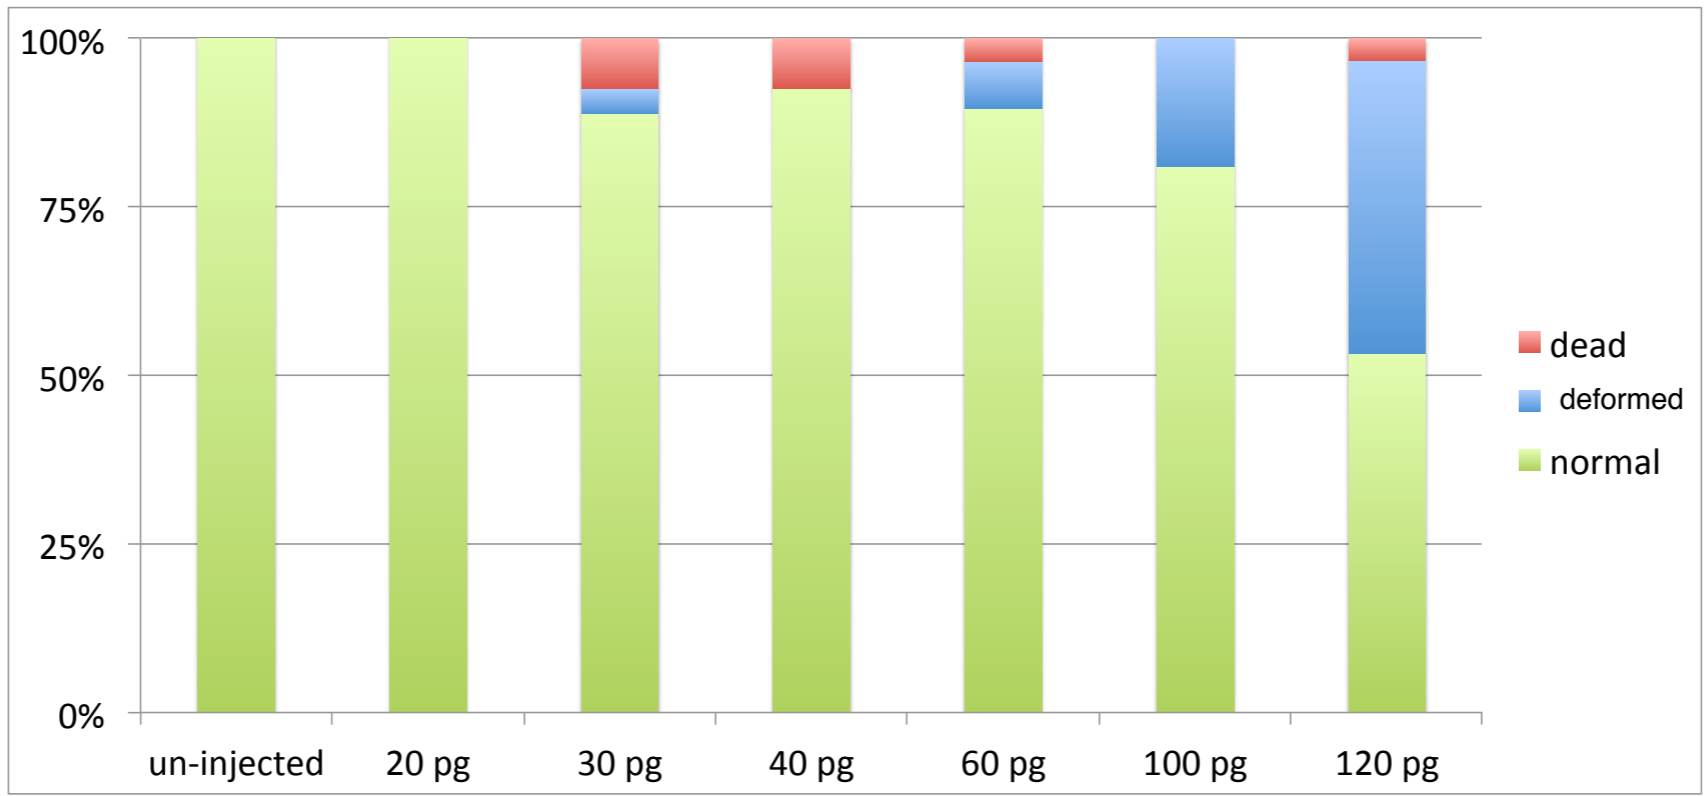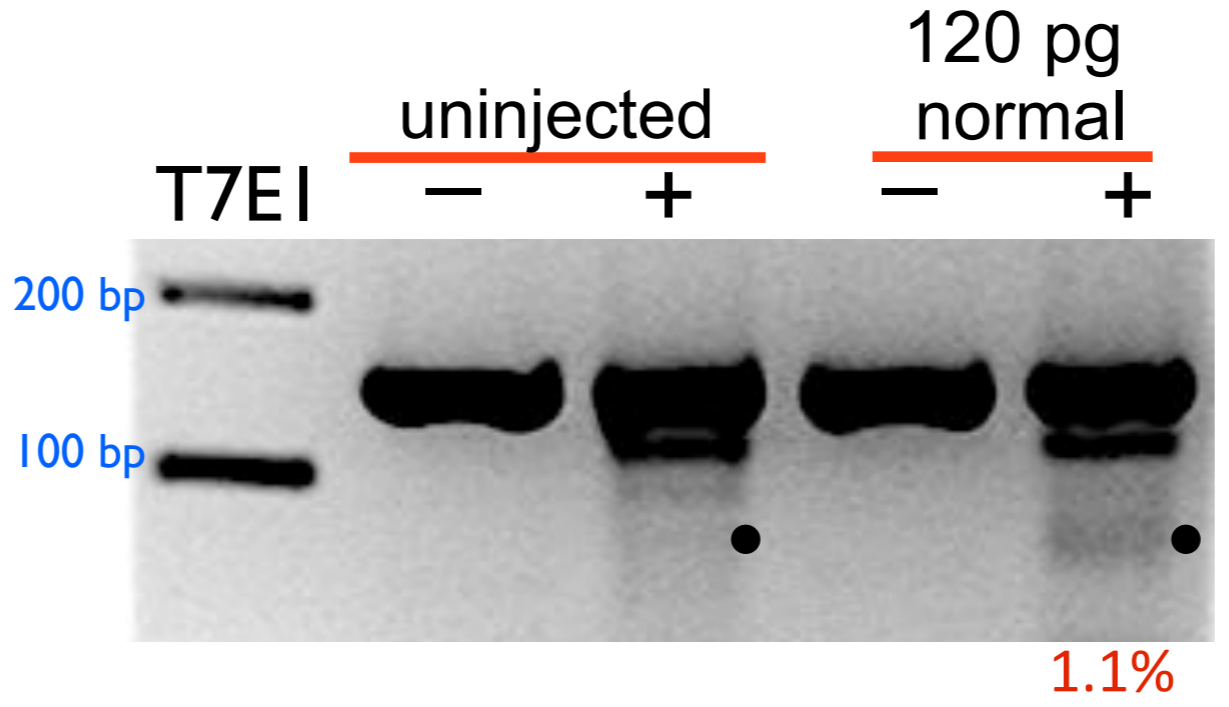

Supplementary Figure 6.

*col17a1a* GGTCCTGCTGGTC **cadctg** GACTATCAGGTAT  
 HpyI66II

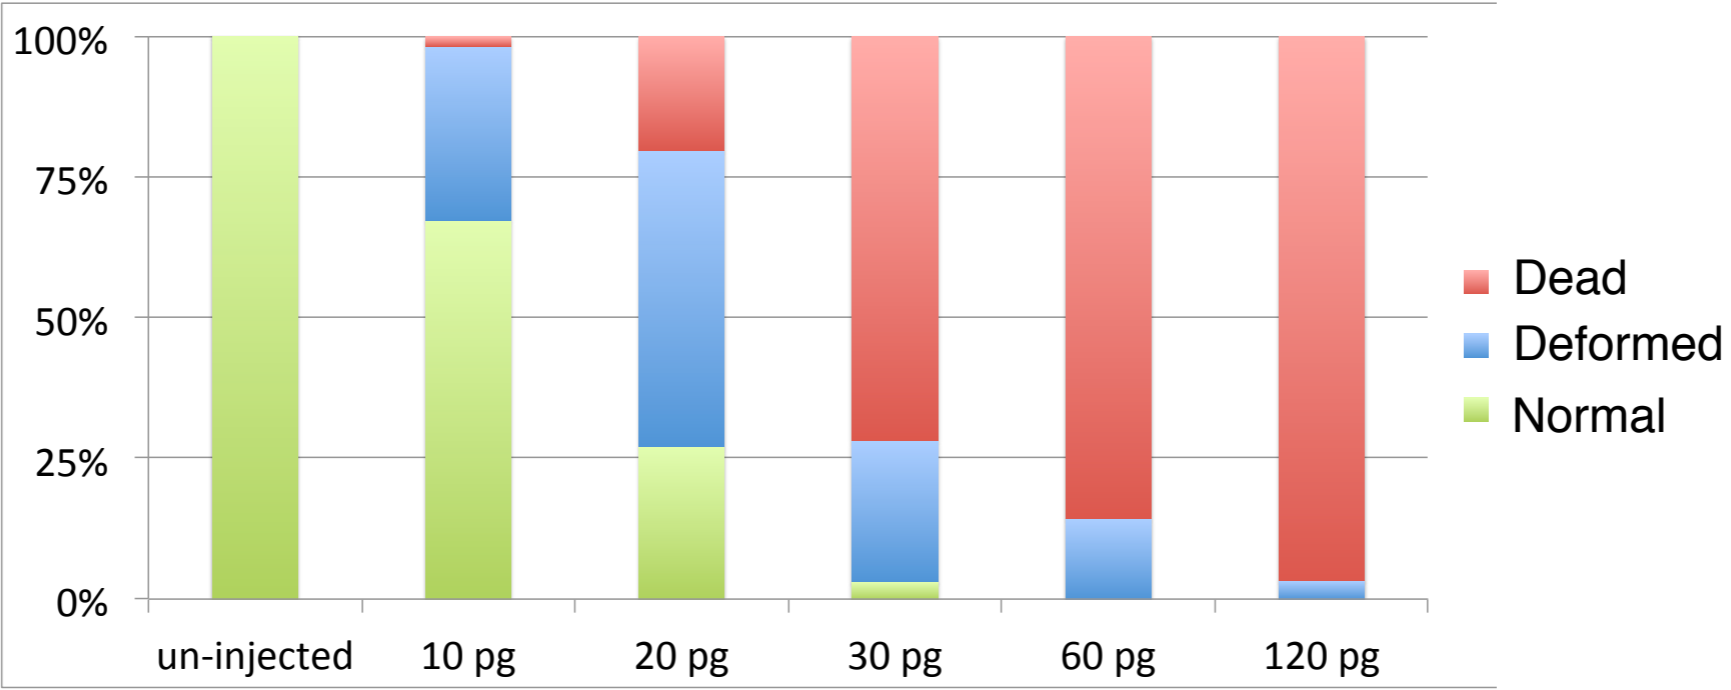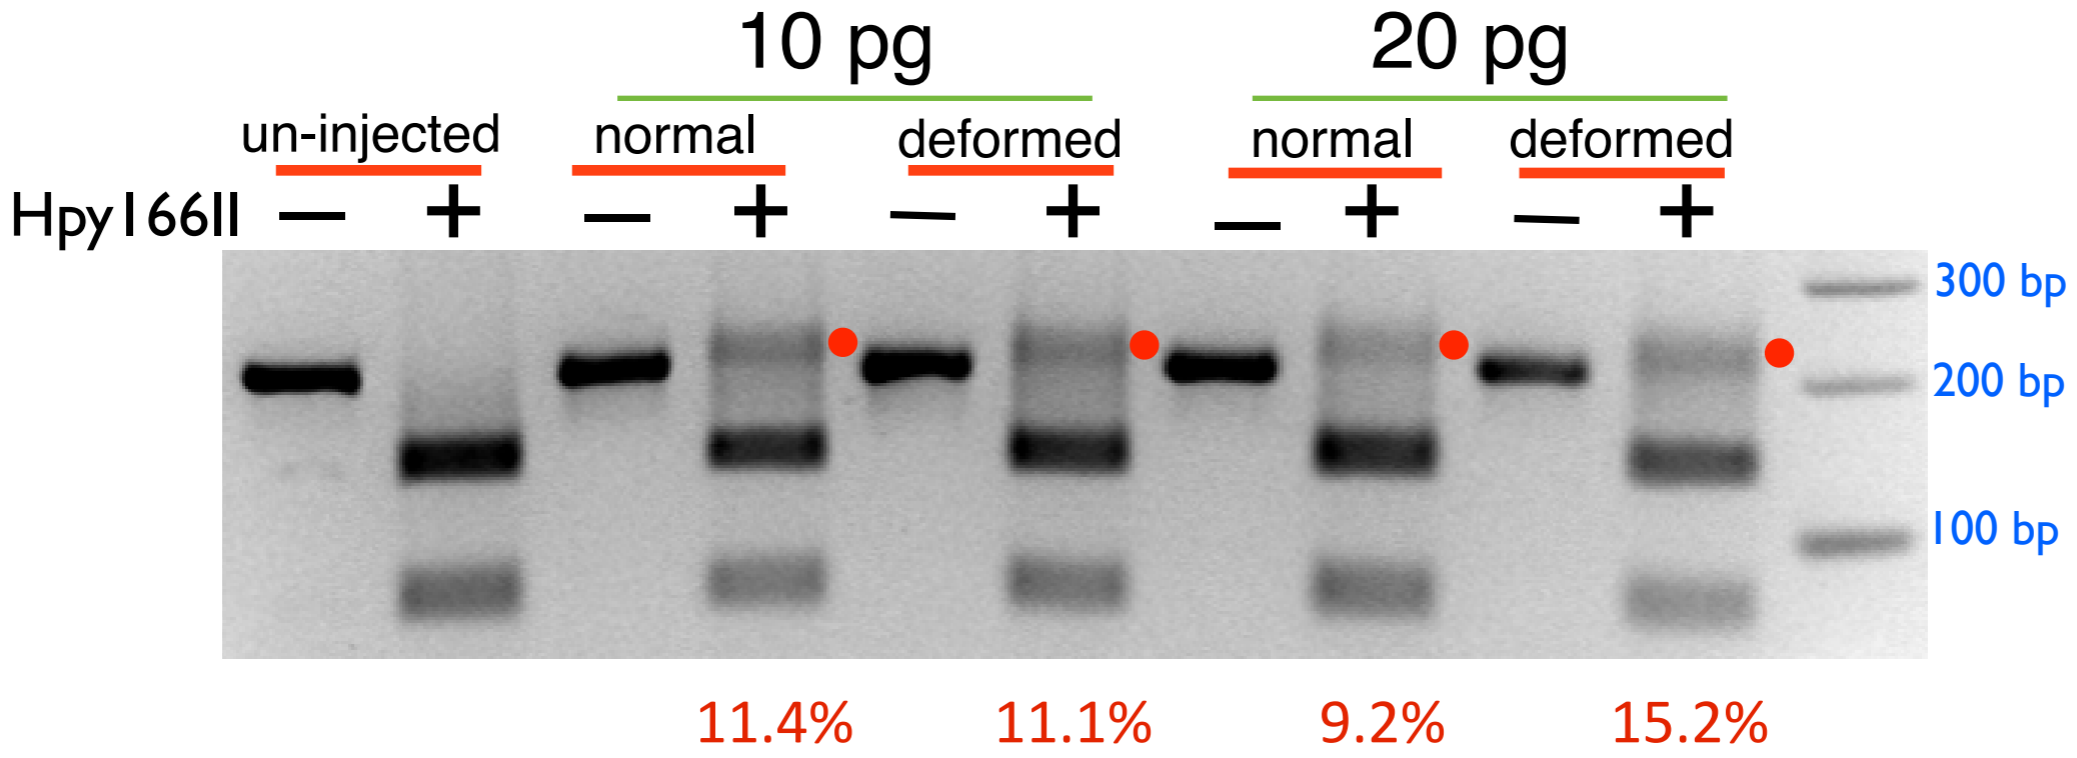

Supplementary Figure 7.

***BRCA1***

CTGTGGTTGGTC **agaaa** GATAAGCCAGTT

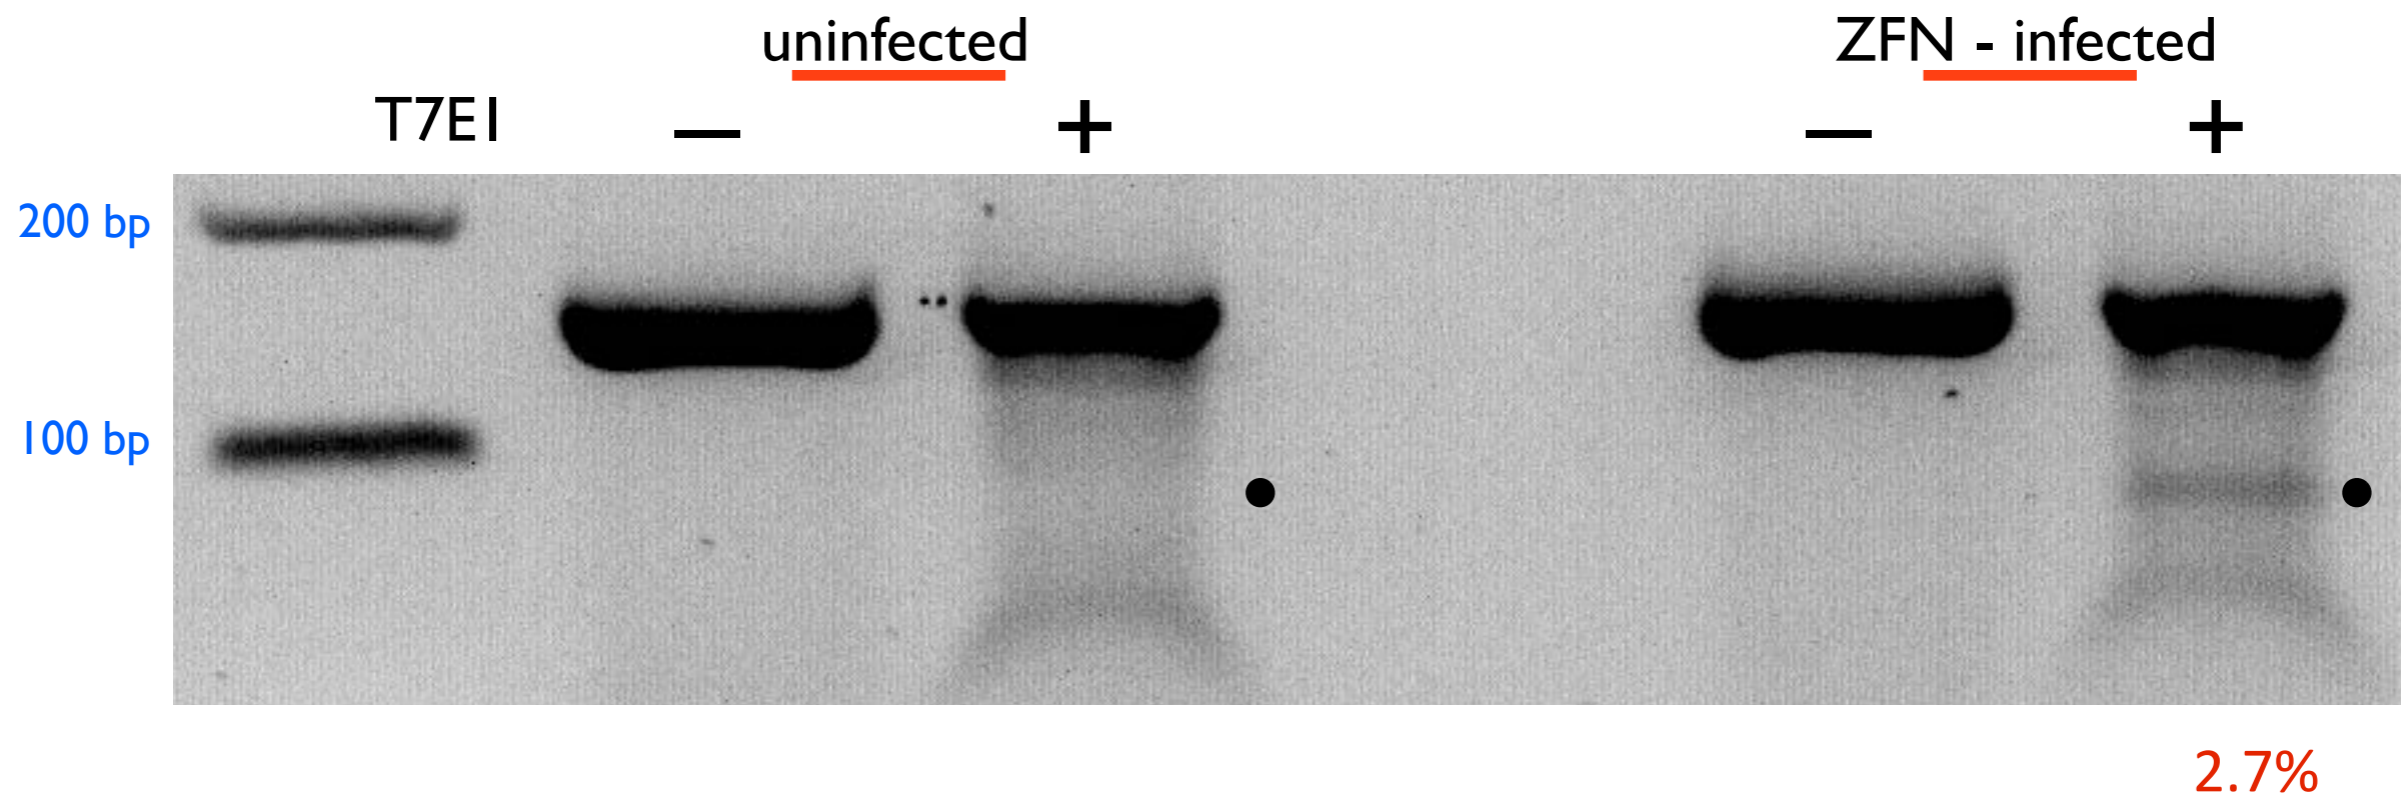

Supplementary Figure 8.

hebp2

|                            |                            |                      |                      |      |                    |
|----------------------------|----------------------------|----------------------|----------------------|------|--------------------|
| GAA                        | <b>TTGATACTTTTC</b>        | AG--GGT              | <b>GATGACTATGAAG</b> | TCCG | Reference sequence |
| GAATTGATACTTT              | -----                      | GGT                  | GATGACTATGAAGTCCG    |      | -4                 |
| GAATTGATACTTTTCAG          | -----                      | ATGACTATGAAGTCCG     |                      |      | -4                 |
| GAATTGATACTTTTC            | -----                      | ATGACTATGAAGTCCG     |                      |      | -6                 |
| GAATTGATACTTTTC            | -----                      | TATGAAGTCCG          |                      |      | -11                |
| GAATTGATACTTTTC            | -----                      | TATGACTATGAAGTCCG    |                      |      | -6, +1             |
| GAATTGATACTT               | -----                      | GTGGATGACTATGAAGTCCG |                      |      | -8, +3             |
| GAATTGATACTTTTCAG          | --GT----                   | ACTATGAAGTCCG        |                      |      | -6, +1             |
| GAATTGATACTTT              | -GATACTTTGATGACTATGAAGTCCG |                      |                      |      | -6, +7             |
| GAATTGATACTTTTCACTATGTGAAA | ACTATGAAGTCCG              |                      |                      |      | -8, +10            |

IRS2

|               |                   |            |           |                                       |        |                            |     |                    |
|---------------|-------------------|------------|-----------|---------------------------------------|--------|----------------------------|-----|--------------------|
| CAG           | <b>GCCATCCAAC</b> | TTTTT      | CACA      | -----                                 | GAACAA | <b>GACTAGCAGAGACATGTTG</b> | GAT | Reference sequence |
| CAGGCCATCCAAC | TTTTT             | CACA       | -----     | CAGACTAGCAGAGACATGTTGGAT              |        |                            |     | -4                 |
| CAGGCCATCCAAC | TTTTT             | CACA       | -----     | AGACTAGCAGAGACATGTTGGAT               |        |                            |     | -7                 |
| CAGGCCATCCAAC | TTTTT             | CACA       | -----     | GCTAGCAGAGACATGTTGGAT                 |        |                            |     | -7                 |
| CAGGCCATCCAAC | TTTTT             | CAC        | -----     | TAGCAGAGACATGTTGGAT                   |        |                            |     | -9                 |
| CAGGCCATCCAAC | TTTTT             | CAC        | -----     | AGCAGAGACATGTTGGAT                    |        |                            |     | -10                |
| CAGGCCATCCAAC | TTTTT             | CACA       | -----     | GCAGAGACATGTTGGAT                     |        |                            |     | -11                |
| CAGGCCATCCAAC | TTTTT             | CACA       | -----     | GCAGAGACTAGCAGAGACATGTTGGAT           |        |                            |     | -4, +3             |
| CAGGCCATCCAAC | TTTTT             | CAC        | -----     | TTTTAGCAGAGACATGTTGGAT                |        |                            |     | -10, +3            |
| CAGGCCATCCAAC | TTTTT             | CACA       | -----     | GCAGACTAGCAGCAGACTAGCAGTAGACATGTTGGAT |        |                            |     | -6, +14            |
| CAGGCCATCCAAC | TTTTT             | CACAGAGAAA | AAGCTTTTT | CACAGAGACTAGCAGAGACATGTTGGAT          |        |                            |     | -14, +23           |

coll7a1a

|                     |                                  |                  |       |       |                     |     |                    |
|---------------------|----------------------------------|------------------|-------|-------|---------------------|-----|--------------------|
| CAG                 | <b>GCCTGCTGGTC</b>               | C                | ----- | ACCTG | <b>GACTATCAGGTA</b> | TCA | Reference sequence |
| CAGGCCTGCTGGT       | -----                            | GGACTATCAGGTATCA |       |       |                     |     | -6                 |
| CAGGCCTGCTGGTCC     | -----                            | TATCAGGTATCA     |       |       |                     |     | -8                 |
| CAGGCCTGCTGGTC      | -----                            | TATCAGGTATCA     |       |       |                     |     | -9                 |
| CAGGCCTGCTGGTCC     | ---TGGATAGGACTATCAGGTATCA        |                  |       |       |                     |     | -4, +6             |
| CAGGCCTGCTGGTCCACCT | -ACCTGGACTATCAGGTATCA            |                  |       |       |                     |     | +4                 |
| CAGGCCT             | ---ATCAGGACTATCAGGACTATCAGGTATCA |                  |       |       |                     |     | -12, +13           |

abcc8

|                                     |                  |                |                   |                     |     |                    |
|-------------------------------------|------------------|----------------|-------------------|---------------------|-----|--------------------|
| TAA                                 | <b>CGGCTTCTC</b> | CGT---         | GG                | <b>ACAGATAATGCA</b> | CTG | Reference sequence |
| TAACGGCTTCTCCGTAACGGACAGATAATGCACTG |                  |                |                   |                     |     | +3                 |
| TAACGGCT                            | ---              | CGT---         | GGACAGATAATGCACTG |                     |     | -4                 |
| TAACGGCTTCTC                        | -----            | CAGATAATGCACTG |                   |                     |     | -6                 |
| TAACGGCTTCTC                        | -----            | AGATAATGCACTG  |                   |                     |     | -7                 |
| TAACGGCTT                           | -----            | GATAATGCACTG   |                   |                     |     | -11                |

sim1a

|                      |                           |                      |                         |      |                    |
|----------------------|---------------------------|----------------------|-------------------------|------|--------------------|
| AGA                  | <b>CCCTAATCCGAGCCACA</b>  | CAGCA                | <b>GATGATCAAAGAGGAG</b> | GAAA | Reference sequence |
| AGACCCTAATCCGAGCCACA | --GCAGATGATCAAAGAGGAGGAAA |                      |                         |      | -2                 |
| AGACCCTAATCCGAGCCACA | -----                     | GATGATCAAAGAGGAGGAAA |                         |      | -5                 |

met

|                           |       |                         |     |                    |
|---------------------------|-------|-------------------------|-----|--------------------|
| <b>CTCCTCCTGCTCCTGATC</b> | GCTGT | <b>GTTTGTGGATCAAGAG</b> | AAA | Reference sequence |
| CTCCTCCTGCTCCTGATG        | ----- | TTTGTGGATCAAGAGAAA      |     | -6                 |
